# Supplementary material
Source: PubMed Central journal article supplement (PMC3268273)
Supplement: 1119009109_pnas.201119009SI.pdf [file 1119009109_pnas.201119009SI.pdf]

# Supporting Information

Kirch et al. 10.1073/pnas.1119009109

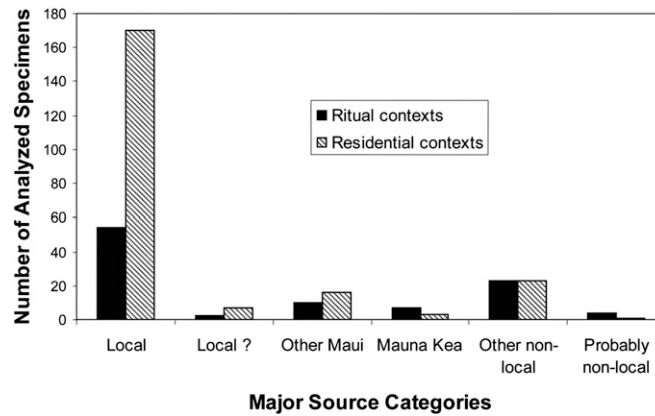

Fig. S1. Distribution of analyzed specimens grouped by major source categories in ritual (black) versus residential (hatched) contexts.

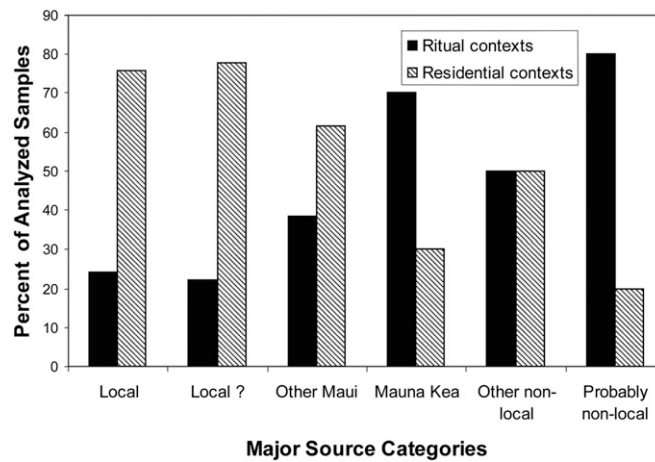

Fig. S2. Relative frequencies of main volcanic rock source categories by ritual (black) and residential (hatched) site categories.

**Table S1. Archaeological features in Kahikinui district with lithic artifacts sampled for X-ray fluorescence (XRF) analysis**

| Feature no.  | Feature type                 | Probable function                  | Excavated area, m <sup>2</sup> | XRF samples analyzed, <i>n</i> |
|--------------|------------------------------|------------------------------------|--------------------------------|--------------------------------|
| 75           | Square enclosure             | Ritual/temple                      | 2                              | 2                              |
| 76           | Square enclosure             | Ritual/temple                      | 4                              | 10                             |
| 77           | Enclosure                    | Ritual/temple                      | 3                              | 24                             |
| 115          | Irregular                    | Ritual/temple                      | 4                              | 4                              |
| 117          | Enclosure and terrace        | Elite residential (priest's house) | 12                             | 35                             |
| 263          | Square enclosure             | Residential                        | 2                              | 4                              |
| 270          | Rectangular enclosure        | Residential                        | 1                              | 1                              |
| 286          | Rectangular enclosure        | Residential                        | 2                              | 10                             |
| 310          | Rectangular enclosure        | Residential                        | 2                              | 1                              |
| 331          | L-shaped shelter             | Residential                        | 3                              | 1                              |
| 366          | Rectangular enclosure        | Ritual/temple                      | 1                              | 1                              |
| 380          | C-shaped shelter             | Residential                        | 1                              | 1                              |
| 391          | Rectangular enclosure        | Residential                        | 2                              | 2                              |
| 414          | Irregular enclosure          | Ritual/temple                      | Surface-collected              | 1                              |
| 724          | Rectangular enclosure        | Residential                        | Surface-collected              | 1                              |
| 725          | Rectangular enclosure        | Residential                        | 12                             | 30                             |
| 726          | Shelter                      | Residential                        | 13                             | 14                             |
| 736          | Lithic scatter               | Residential                        | Surface-collected              | 1                              |
| 742          | Shelter                      | Residential                        | 28                             | 3                              |
| 752          | L-shaped shelter and terrace | Residential                        | 26                             | 62                             |
| 755          | Multiple terrace complex     | Residential                        | 27                             | 7                              |
| 1011         | C-shaped shelter             | Residential                        | 9                              | 1                              |
| 1068         | Square enclosure             | Residential                        | 1                              | 2                              |
| 1137         | Rock shelter                 | Residential                        | 2                              | 14                             |
| 1156         | Rectangular enclosure        | Ritual/temple                      | 3                              | 1                              |
| 1164         | Lithic scatter               | Residential                        | Surface-collected              | 2                              |
| 1217         | Rectangular enclosure        | Residential                        | 1                              | 2                              |
| 1222         | L-shaped shelter             | Residential                        | 1                              | 1                              |
| 1269         | Rectangular enclosure        | Residential                        | 6                              | 11                             |
| 1285         | Rock shelter                 | Residential                        | 1                              | 6                              |
| 1304         | Platform                     | Ritual/shrine                      | 7                              | 3                              |
| 1307         | Terrace complex              | Ritual/shrine                      | 2                              | 20                             |
| 1308         | C-shaped shelter             | Residential                        | 1                              | 2                              |
| 1309         | Rectangular enclosure        | Residential                        | 1                              | 26                             |
| 1310         | Rectangular enclosure        | Residential                        | 2                              | 11                             |
| M11          | Rectangular enclosure        | Residential                        | 8                              | 11                             |
| <b>Total</b> |                              |                                    |                                | <b>328</b>                     |

**Table S2. Average concentration values (in bold) and SDs for 17 defined geochemical groups (A–Q) compared with 26 analyses of the US Geological Survey standard basalt, Hawaiian Volcanic Observatory (BHVO-2)**

| Element/<br>Oxide                           | Group (n) |     |        |     |        |     |        |     |       |    |       |     |       |     |        |     |        |     | Acc.  |     |       |     |        |     |        |     |       |     |       |     |       |     |       |     |             |     |       |     |       |   |     |
|---------------------------------------------|-----------|-----|--------|-----|--------|-----|--------|-----|-------|----|-------|-----|-------|-----|--------|-----|--------|-----|-------|-----|-------|-----|--------|-----|--------|-----|-------|-----|-------|-----|-------|-----|-------|-----|-------------|-----|-------|-----|-------|---|-----|
|                                             | A (102)   |     | B (60) |     | C (64) |     | D (25) |     | E (5) |    | F (6) |     | G (5) |     | H (10) |     | I (10) |     | J (2) |     | K (4) |     | L (11) |     | M (11) |     | N (2) |     | O (3) |     | P (2) |     | Q (3) |     | BHVO-2 (26) |     |       |     |       |   |     |
|                                             | Av.       | SD  | Av.    | SD  | Av.    | SD  | Av.    | SD  | Av.   | SD | Av.   | SD  | Av.   | SD  | Av.    | SD  | Av.    | SD  | Av.   | SD  | Av.   | SD  | Av.    | SD  | Av.    | SD  | Av.   | SD  | Av.   | SD  | Av.   | SD  | Av.   | SD  | Av.         | SD  |       |     |       |   |     |
| Rb*                                         | 50        | 8   | 61     | 7   | 47     | 9   | 13     | 4   | 18    | 1  | 29    | 12  | 26    | 4   | 19     | 5   | 34     | 6   | 26    | 6   | 26    | 0   | 73     | 7   | 73     | 11  | 76    | 11  | 23    | 0   | 26    | 2   | 32    | 16  | 98          | 3   | 13    | 1   | 10    |   |     |
| Sr*                                         | 1,084     | 144 | 1,116  | 83  | 959    | 106 | 340    | 46  | 543   | 13 | 785   | 79  | 815   | 33  | 434    | 62  | 557    | 24  | 486   | 20  | 486   | 20  | 1,332  | 44  | 1,077  | 62  | 828   | 56  | 416   | 7   | 653   | 37  | 419   | 3   | 1,773       | 177 | 383   | 8   | 389   |   |     |
| Y*                                          | 39        | 3   | 40     | 3   | 36     | 3   | 48     | 30  | 24    | 2  | 33    | 6   | 41    | 4   | 41     | 7   | 40     | 3   | 44    | 1   | 44    | 1   | 42     | 1   | 48     | 7   | 49    | 6   | 201   | 84  | 31    | 2   | 60    | 6   | 48          | 3   | 27    | 1   | 26    |   |     |
| Zr*                                         | 292       | 33  | 391    | 30  | 302    | 38  | 136    | 18  | 125   | 5  | 265   | 20  | 346   | 31  | 217    | 16  | 317    | 23  | 299   | 12  | 299   | 12  | 450    | 36  | 478    | 19  | 536   | 49  | 247   | 7   | 181   | 4   | 435   | 70  | 613         | 24  | 189   | 6   | 172   |   |     |
| Nb*                                         | 58        | 9   | 68     | 6   | 57     | 7   | 10     | 2   | 24    | 3  | 46    | 10  | 27    | 2   | 13     | 2   | 36     | 3   | 21    | 0   | 85    | 4   | 87     | 8   | 90     | 11  | 17    | 0   | 26    | 2   | 30    | 7   | 115   | 7   | 18          | 1   | 18    |     |       |   |     |
| Na <sub>2</sub> O <sup>†</sup>              | 3         | 1   | 3      | 1   | 3      | 1   | 2      | 0   | 3     | 0  | 2     | 1   | 3     | 1   | 2      | 0   | 3      | 1   | 3     | 1   | 3     | 0   | 4      | 1   | 4      | 1   | 5     | 1   | 2     | 0   | 3     | 1   | 2     | 0   | 3           | 0   | 2     | 0   | 2     |   |     |
| MgO <sup>†</sup>                            | 3         | 1   | 2      | 1   | 3      | 2   | 5      | 2   | 5     | 2  | 3     | 1   | 4     | 1   | 4      | 1   | 4      | 1   | 3     | 1   | 3     | 1   | 2      | 0   | 1      | 0   | 1     | 1   | 3     | 0   | 3     | 2   | 3     | 2   | 3           | 2   | 0     | 0   | 7     | 0 |     |
| Al <sub>2</sub> O <sub>3</sub> <sup>†</sup> | 16        | 2   | 17     | 2   | 15     | 2   | 13     | 2   | 15    | 1  | 17    | 3   | 16    | 2   | 14     | 2   | 14     | 1   | 14    | 1   | 14    | 1   | 18     | 2   | 17     | 2   | 18    | 2   | 12    | 0   | 16    | 5   | 12    | 2   | 15          | 1   | 13    | 0   | 14    |   |     |
| SiO <sub>2</sub> <sup>†</sup>               | 42        | 5   | 45     | 6   | 39     | 7   | 43     | 8   | 43    | 5  | 33    | 6   | 40    | 7   | 43     | 4   | 45     | 3   | 49    | 5   | 48    | 3   | 49     | 6   | 52     | 7   | 44    | 0   | 48    | 3   | 50    | 1   | 39    | 5   | 49          | 1   | 50    |     |       |   |     |
| K <sub>2</sub> O <sup>†</sup>               | 1         | 0   | 2      | 0   | 1      | 0   | 1      | 0   | 1     | 0  | 1     | 0   | 1     | 0   | 1      | 0   | 1      | 0   | 1     | 0   | 1     | 0   | 2      | 0   | 2      | 0   | 2     | 0   | 1     | 0   | 1     | 0   | 1     | 0   | 2           | 0   | 1     | 0   | 1     | 0 |     |
| CaO <sup>†</sup>                            | 8         | 1   | 7      | 1   | 8      | 1   | 10     | 1   | 10    | 0  | 9     | 1   | 7     | 1   | 9      | 1   | 8      | 0   | 8     | 0   | 8     | 0   | 7      | 1   | 6      | 1   | 5     | 1   | 9     | 1   | 8     | 1   | 6     | 1   | 4           | 0   | 11    | 0   | 11    |   |     |
| TiO <sub>2</sub> <sup>†</sup>               | 4         | 0   | 3      | 0   | 3      | 0   | 2      | 0   | 2     | 0  | 3     | 0   | 4     | 0   | 3      | 0   | 4      | 0   | 3     | 0   | 3     | 0   | 3      | 0   | 2      | 0   | 2     | 0   | 3     | 0   | 3     | 0   | 3     | 0   | 2           | 0   | 3     | 0   | 3     | 0 |     |
| V <sup>†</sup>                              | 350       | 50  | 300    | 50  | 350    | 50  | 300    | 50  | 300   | 0  | 400   | 50  | 450   | 50  | 350    | 50  | 450    | 50  | 450   | 50  | 450   | 50  | 200    | 50  | 150    | 50  | 150   | 50  | 450   | 0   | 400   | 50  | 400   | 0   | 150         | 0   | 353   | 18  | 317   |   |     |
| MnO <sup>†</sup>                            | 1,700     | 200 | 2,000  | 300 | 1,600  | 100 | 1,600  | 100 | 1,400 | 0  | 1,500 | 200 | 1,300 | 100 | 1,500  | 100 | 1,600  | 100 | 1,700 | 100 | 1,700 | 100 | 2,400  | 200 | 3,000  | 400 | 3,200 | 600 | 1,500 | 200 | 1,400 | 200 | 1,600 | 100 | 3,600       | 100 | 1,500 | 100 | 1,666 |   |     |
| Fe <sup>†,‡</sup>                           | 11        | 2   | 10     | 2   | 12     | 2   | 8      | 2   | 10    | 1  | 14    | 1   | 11    | 2   | 10     | 2   | 11     | 1   | 12    | 0   | 9     | 0   | 9      | 0   | 9      | 1   | 8     | 2   | 10    | 1   | 11    | 4   | 12    | 0   | 5           | 1   | 9     | 0   | 9     |   |     |
| Ni <sup>†</sup>                             | 0         | 0   | 0      | 0   | 10     | 0   | 80     | 20  | 70    | 0  | 40    | 10  | 40    | 0   | 60     | 20  | 10     | 0   | 20    | 0   | 20    | 0   | 0      | 0   | 0      | 0   | 0     | 0   | 0     | 40  | 0     | 0   | 0     | 0   | 0           | 0   | 0     | 0   | 89    | 5 | 119 |
| Cu <sup>†</sup>                             | 20        | 0   | 20     | 10  | 50     | 20  | 90     | 20  | 20    | 10 | 80    | 60  | 30    | 10  | 110    | 40  | 40     | 20  | 30    | 10  | 10    | 10  | 10     | 10  | 10     | 10  | 10    | 10  | 100   | 20  | 30    | 20  | 50    | 20  | 20          | 0   | 119   | 8   | 127   |   |     |
| Zn <sup>†</sup>                             | 140       | 10  | 140    | 20  | 140    | 20  | 130    | 10  | 130   | 0  | 149   | 10  | 150   | 10  | 150    | 20  | 150    | 10  | 180   | 20  | 180   | 20  | 140    | 10  | 150    | 20  | 150   | 10  | 150   | 10  | 130   | 0   | 170   | 0   | 100         | 0   | 97    | 3   | 103   |   |     |

Acc. value, accepted value; Av., average.

\*Reported concentrations and SDs for Rb, Sr, Y, Zr, and Nb are rounded to 1 ppm.

†Data for other elements are rounded to reflect varying degrees of analytical accuracy per Lundblad et al. (1): Na<sub>2</sub>O, K<sub>2</sub>O, TiO<sub>2</sub>, and Fe are rounded to 0.1%; MgO, Al<sub>2</sub>O<sub>3</sub>, and SiO<sub>2</sub> are rounded to 1%; CaO is rounded to 1%; Ni, Cu, and Zn are rounded to 10 ppm; V is rounded to 50 ppm; and MnO is rounded to 100 ppm.

‡Total Fe is reported in a format following Shackley (2).

1. Lundblad SP, Mills PR, Drake-Raue A, Kikiloi SK (2010) Non-destructive EDXRF analyses of archaeological basalts. X-Ray Fluorescence Spectrometry in Gearchaeology, ed Shackley MS (Springer, New York), pp 65–80.  
 2. Shackley MS (2005) Archaeological petrology and the archaeometry of lithic materials. *Archaeometry* 50:194–215.

**Table S3. Distribution of analyzed lithic artifacts by archaeological feature and geochemical groups**

| Feature             | Group      |           |           |           |          |          |          |           |           |          |          |           |           |          |          |          |          | Outliers | No. of artifacts sampled | No. of groups |   |  |   |            |    |   |
|---------------------|------------|-----------|-----------|-----------|----------|----------|----------|-----------|-----------|----------|----------|-----------|-----------|----------|----------|----------|----------|----------|--------------------------|---------------|---|--|---|------------|----|---|
|                     | A          | B         | C         | D         | E        | F        | G        | H         | I         | J        | K        | L         | M         | N        | O        | P        | Q        |          |                          |               |   |  |   |            |    |   |
| 75                  |            |           |           |           |          |          |          | 1         |           |          |          |           |           |          | 1        |          |          |          |                          |               |   |  |   |            | 2  | 2 |
| 76                  | 3          |           |           | 3         |          |          |          | 1         | 2         |          |          |           |           |          | 1        |          |          |          |                          |               |   |  |   |            | 10 | 5 |
| 77                  | 7          | 4         | 3         | 4         |          | 1        |          |           | 4         |          |          |           |           |          |          |          | 1        |          |                          |               |   |  |   | 24         | 7  |   |
| 115                 | 1          |           | 1         |           |          | 1        |          |           | 1         |          |          |           |           |          |          |          |          |          |                          |               |   |  |   | 4          | 4  |   |
| 117                 | 7          | 13        | 2         | 3         | 4        |          |          |           |           |          |          |           | 6         |          |          |          |          |          |                          |               |   |  |   | 35         | 6  |   |
| 263                 |            |           | 4         |           |          |          |          |           |           |          |          |           |           |          |          |          |          |          |                          |               |   |  |   | 4          | 1  |   |
| 270                 |            |           | 1         |           |          |          |          |           |           |          |          |           |           |          |          |          |          |          |                          |               |   |  |   | 1          | 1  |   |
| 286                 | 2          | 1         | 3         | 1         |          |          |          | 1         |           |          |          |           |           |          |          |          | 2        |          |                          |               |   |  |   | 10         | 6  |   |
| 310                 |            |           | 1         |           |          |          |          |           |           |          |          |           |           |          |          |          |          |          |                          |               |   |  |   | 1          | 1  |   |
| 331                 |            |           |           |           |          |          |          |           |           |          |          |           |           |          |          |          |          |          |                          |               |   |  | 1 | 1          | 1  |   |
| 366                 | 1          |           |           |           |          |          |          |           |           |          |          |           |           |          |          |          |          |          |                          |               |   |  |   | 1          | 1  |   |
| 380                 |            |           |           |           | 1        |          |          |           |           |          |          |           |           |          |          |          |          |          |                          |               |   |  |   | 1          | 1  |   |
| 391                 | 2          |           |           |           |          |          |          |           |           |          |          |           |           |          |          |          |          |          |                          |               |   |  |   | 2          | 1  |   |
| 414                 |            |           |           |           |          |          |          |           |           |          |          |           |           |          |          |          |          |          |                          |               |   |  | 1 | 1          | 1  |   |
| 724                 |            |           |           |           |          |          |          |           |           |          |          | 1         |           |          |          |          |          |          |                          |               |   |  |   | 1          | 1  |   |
| 725                 | 6          | 3         | 15        |           |          |          |          |           |           |          |          | 1         | 4         |          |          |          |          |          |                          |               |   |  | 1 | 30         | 6  |   |
| 726                 | 5          | 2         | 4         |           |          | 1        |          |           | 1         |          |          |           |           | 1        |          |          |          |          |                          |               |   |  |   | 14         | 6  |   |
| 736                 | 1          |           |           |           |          |          |          |           |           |          |          |           |           |          |          |          |          |          |                          |               |   |  |   | 1          | 1  |   |
| 742                 | 1          |           | 1         | 1         |          |          |          |           |           |          |          |           |           |          |          |          |          |          |                          |               |   |  |   | 3          | 3  |   |
| 752                 | 10         | 15        | 17        | 3         |          | 1        | 5        | 2         |           |          | 2        |           |           | 3        |          | 1        | 1        | 1        |                          |               |   |  | 1 | 62         | 13 |   |
| 755                 | 3          | 1         | 1         | 1         |          |          |          |           |           |          |          |           |           |          |          |          |          |          |                          |               |   |  | 1 | 7          | 5  |   |
| 1011                |            |           |           |           |          |          |          |           | 1         |          |          |           |           |          |          |          |          |          |                          |               |   |  |   | 1          | 1  |   |
| 1068                | 1          |           |           |           |          |          |          |           |           |          |          |           | 1         |          |          |          |          |          |                          |               |   |  |   | 2          | 1  |   |
| 1137                | 7          | 2         | 3         | 1         |          |          |          |           |           |          |          |           | 1         |          |          |          |          |          |                          |               |   |  |   | 14         | 5  |   |
| 1156                |            |           | 1         |           |          |          |          |           |           |          |          |           |           |          |          |          |          |          |                          |               |   |  |   | 1          | 1  |   |
| 1164                | 1          | 1         |           |           |          |          |          |           |           |          |          |           |           |          |          |          |          |          |                          |               |   |  |   | 2          | 2  |   |
| 1217                | 2          |           |           |           |          |          |          |           |           |          |          |           |           |          |          |          |          |          |                          |               |   |  |   | 2          | 1  |   |
| 1222                | 1          |           |           |           |          |          |          |           |           |          |          |           |           |          |          |          |          |          |                          |               |   |  |   | 1          | 1  |   |
| 1269                | 4          | 3         |           |           |          |          |          |           |           |          |          |           | 2         |          |          |          |          |          |                          |               | 2 |  |   | 11         | 4  |   |
| 1285                | 5          | 1         |           |           |          |          |          |           |           |          |          |           |           |          |          |          |          |          |                          |               |   |  |   | 6          | 3  |   |
| 1304                | 1          | 1         |           | 1         |          |          |          |           |           |          |          |           |           |          |          |          |          |          |                          |               |   |  |   | 3          | 3  |   |
| 1307                | 7          | 1         | 1         | 3         |          |          |          | 2         |           | 2        | 1        | 3         |           |          |          |          |          |          |                          |               |   |  |   | 20         | 8  |   |
| 1308                |            |           |           | 2         |          |          |          |           |           |          |          |           |           |          |          |          |          |          |                          |               |   |  |   | 2          | 1  |   |
| 1309                | 10         | 8         | 3         | 1         |          | 2        |          | 1         | 1         |          |          |           |           |          |          |          |          |          |                          |               |   |  |   | 26         | 7  |   |
| 1310                | 3          | 4         | 2         |           |          |          |          | 2         |           |          |          |           |           |          |          |          |          |          |                          |               |   |  |   | 11         | 4  |   |
| M11                 | 9          |           |           | 1         |          |          |          |           |           |          |          |           | 1         |          |          |          |          |          |                          |               |   |  |   | 11         | 3  |   |
| <b>Group totals</b> | <b>101</b> | <b>60</b> | <b>63</b> | <b>25</b> | <b>5</b> | <b>6</b> | <b>5</b> | <b>10</b> | <b>10</b> | <b>2</b> | <b>4</b> | <b>11</b> | <b>11</b> | <b>2</b> | <b>3</b> | <b>2</b> | <b>3</b> | <b>5</b> |                          |               |   |  |   | <b>328</b> |    |   |

**Table S4. Analytical data for known Hawaiian high-silica adze sources**

| Oxide                          | O'ahu         |               | Kaho'olawe    | Lāna'i        |               | West Moloka'i |               |
|--------------------------------|---------------|---------------|---------------|---------------|---------------|---------------|---------------|
|                                | Kailua        | Waiahole      | Pu'umoiwi     | Kapohaku      | Kaunolu       | Ka'eo         | Piko wmo112   |
| <i>n</i>                       | 1             | 4             | 4             | 10            | 6.00          | 2             | 1             |
| SiO <sub>2</sub>               | 54.35         | 53.91         | 53.42         | 52.18         | 52.35         | 51.23         | 52.99         |
| TiO <sub>2</sub>               | 2.20          | 2.17          | 3.02          | 2.14          | 2.11          | 3.06          | 2.44          |
| Al <sub>2</sub> O <sub>3</sub> | 14.30         | 14.11         | 14.19         | 14.32         | 14.21         | 13.96         | 13.93         |
| FeO*                           | 10.66         | 10.26         | 12.02         | 11.01         | 10.99         | 12.33         | 11.69         |
| MnO                            | 0.14          | 0.14          | 0.17          | 0.16          | 0.16          | 0.18          | 0.16          |
| MgO                            | 6.09          | 6.65          | 4.66          | 7.28          | 7.23          | 6.01          | 6.64          |
| CaO                            | 9.71          | 9.25          | 8.51          | 10.22         | 10.25         | 9.87          | 9.42          |
| Na <sub>2</sub> O              | 2.71          | 2.70          | 3.05          | 2.30          | 2.36          | 2.62          | 1.94          |
| K <sub>2</sub> O               | 0.36          | 0.73          | 0.87          | 0.44          | 0.52          | 0.65          | 0.48          |
| P <sub>2</sub> O <sub>5</sub>  | 0.29          | 0.32          | 0.40          | 0.25          | 0.25          | 0.42          | 0.31          |
| <b>Sum</b>                     | <b>100.81</b> | <b>100.25</b> | <b>100.31</b> | <b>100.30</b> | <b>100.43</b> | <b>100.32</b> | <b>100.00</b> |

Data for O'ahu, Kaho'olawe, and Lāna'i sources are from Sinton and Sinoto (1).

\*Total Fe is reported as FeO.

1. Sinton J, Sinoto Y (1997) *Prehistoric Long-Distance Interaction in Oceania: An Interdisciplinary Approach*, ed Weisler MI (New Zealand Archaeological Association, Auckland), pp 194–204.

**Table S5. Wavelength-dispersive X-ray fluorescence (WD-XRF) analytical results for selected Kahikinui lithic artifacts**

| Oxide                          | 77-S22-2-7    | 77-S22-2-21  | 77-S174-25 <sup>†</sup> | 115-J21-2-11 | 1011-L14-2B-1 | 76-F5-2-9    | 117-K17-1-9  | 76-F5-FE1-12  | 1309-TP2-2-20 |
|--------------------------------|---------------|--------------|-------------------------|--------------|---------------|--------------|--------------|---------------|---------------|
| SiO <sub>2</sub>               | 49.03         | 49.01        | 49.09                   | 48.97        | 48.79         | 47.71        | 54.29        | 52.40         | 51.70         |
| TiO <sub>2</sub>               | 3.99          | 3.88         | 3.93                    | 3.88         | 3.78          | 3.71         | 2.02         | 2.11          | 3.02          |
| Al <sub>2</sub> O <sub>3</sub> | 13.76         | 13.75        | 13.76                   | 13.57        | 13.65         | 13.36        | 14.32        | 14.10         | 13.28         |
| FeO*                           | 14.13         | 14.17        | 14.25                   | 14.01        | 14.08         | 13.86        | 9.84         | 11.06         | 12.63         |
| MnO                            | 0.20          | 0.20         | 0.20                    | 0.21         | 0.20          | 0.20         | 0.15         | 0.17          | 0.20          |
| MgO                            | 4.95          | 5.03         | 4.94                    | 5.03         | 5.32          | 5.41         | 6.50         | 7.38          | 5.52          |
| CaO                            | 9.63          | 9.68         | 9.67                    | 9.70         | 10.06         | 9.68         | 9.11         | 10.21         | 9.75          |
| Na <sub>2</sub> O              | 2.78          | 2.70         | 2.77                    | 2.64         | 2.58          | 2.88         | 2.53         | 2.00          | 2.16          |
| K <sub>2</sub> O               | 1.15          | 1.03         | 1.07                    | 1.19         | 1.04          | 1.18         | 0.49         | 0.53          | 0.64          |
| P <sub>2</sub> O <sub>5</sub>  | 0.53          | 0.51         | 0.52                    | 0.53         | 0.48          | 0.49         | 0.29         | 0.23          | 0.39          |
| <b>Sum</b>                     | <b>100.14</b> | <b>99.96</b> | <b>100.21</b>           | <b>99.73</b> | <b>99.98</b>  | <b>98.48</b> | <b>99.54</b> | <b>100.19</b> | <b>99.28</b>  |
| LOI                            | -0.59         | -6.69        | -0.06                   | -0.67        | -0.83         | -0.38        | 0.30         | -0.05         | 0.02          |

All values are in wt %. LOI, loss on ignition at 900 °C.

\*Total Fe is reported as FeO.

<sup>†</sup>Sample 77-S174-25 contains 25 ppm Sc, 432 ppm V, 12 ppm Cr, 53 ppm Co, 39 ppm Ni, 147 ppm Zn, 23 ppm Rb, 549 ppm Sr, 38 ppm Y, 293 ppm Zr, 34 ppm Nb, and 279 ppm Ba.

## Dataset S1. Analytical database

[Dataset S1](#)
